# Supplementary figures and images for: Population pharmacokinetic model development and its relationship with adverse events of oxcarbazepine in adult patients with epilepsy
Source: Research Square preprint supplement (doi:10.21203/rs.3.rs-138619/v1), 2021-01-13

STUDY 1

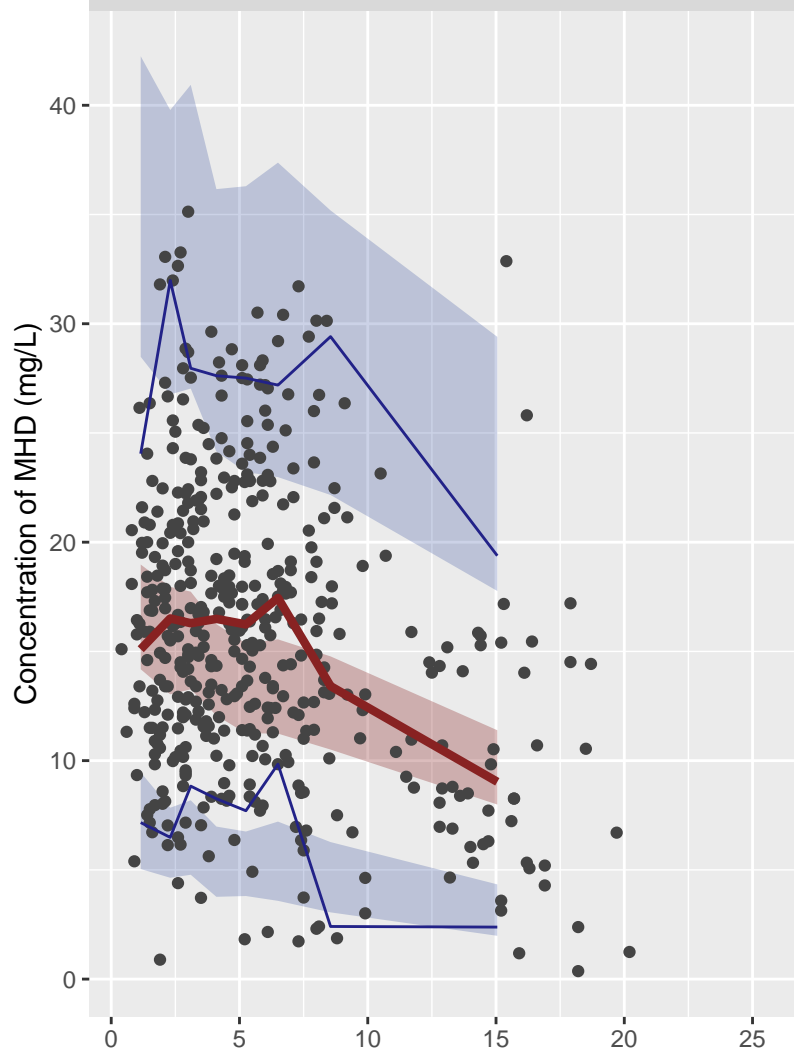

STUDY 2

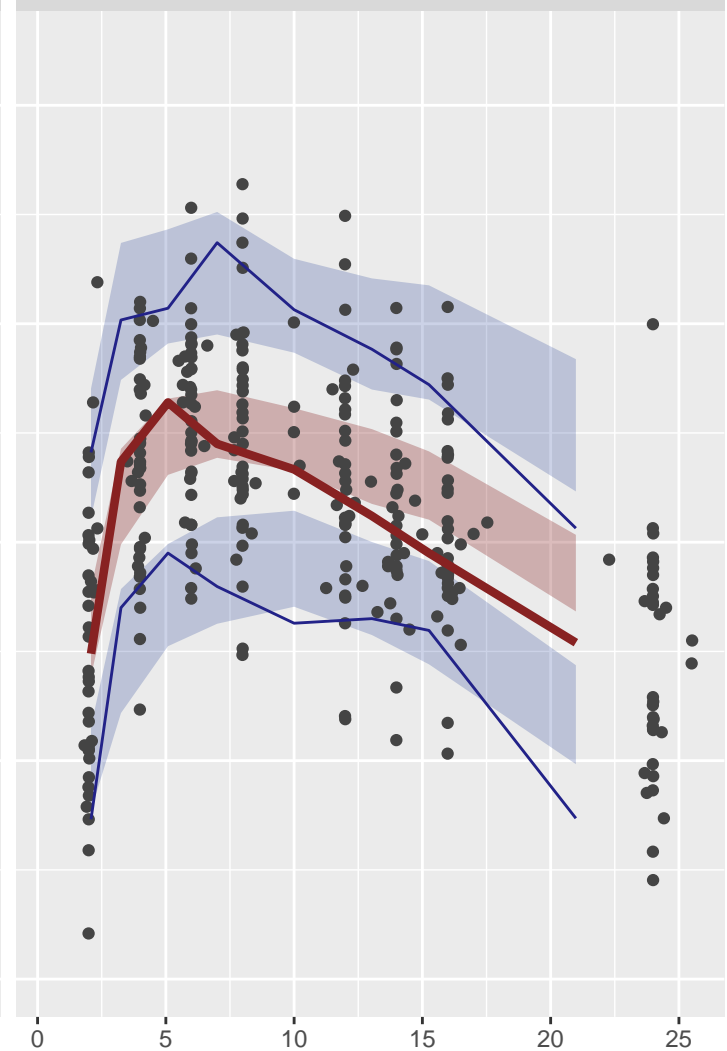

Time after dose (h)

Supplement: Supplementary file 1 [file 8634ffc2e3ae24879fef3d45.pdf]
